# Supplementary material
Source: MDPI journal article supplement (https://www.mdpi.com/2225-1154/11/6/117)
Supplement: s1 [file s1]

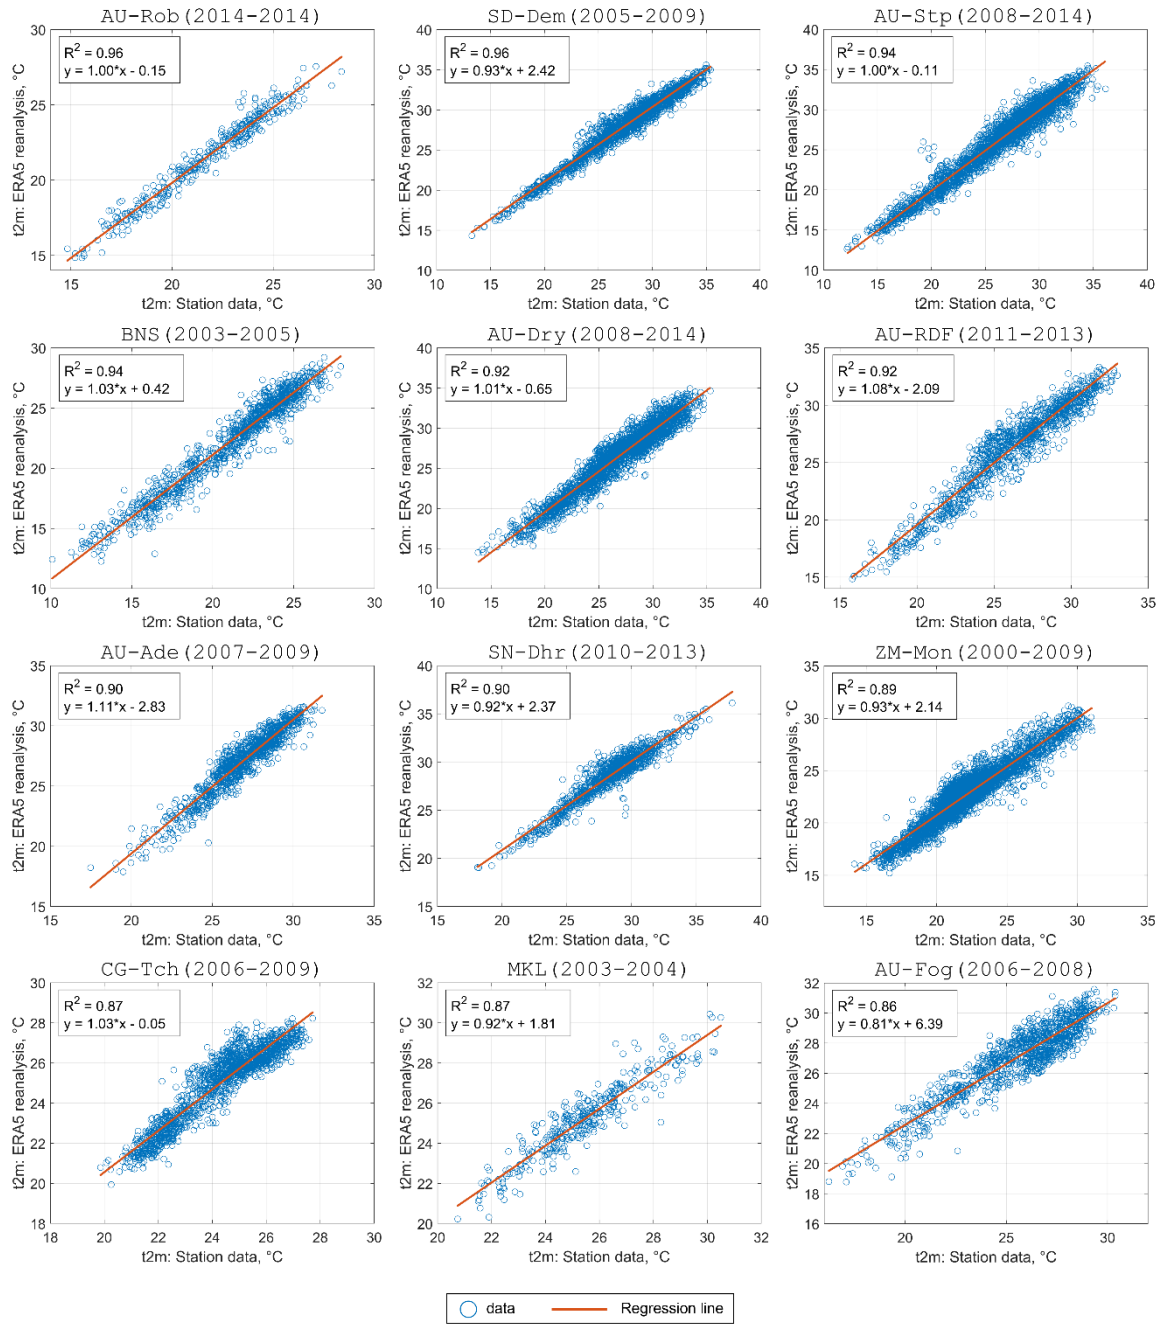

**Figure S1.** Scatter plots for stations with good agreement ( $R^2 \geq 0.85$ ,  $p < 0.05$ ) of daily temperature from ERA5 reanalysis versus FLUXNET data sets. The period is specified in the parentheses of the plot title.

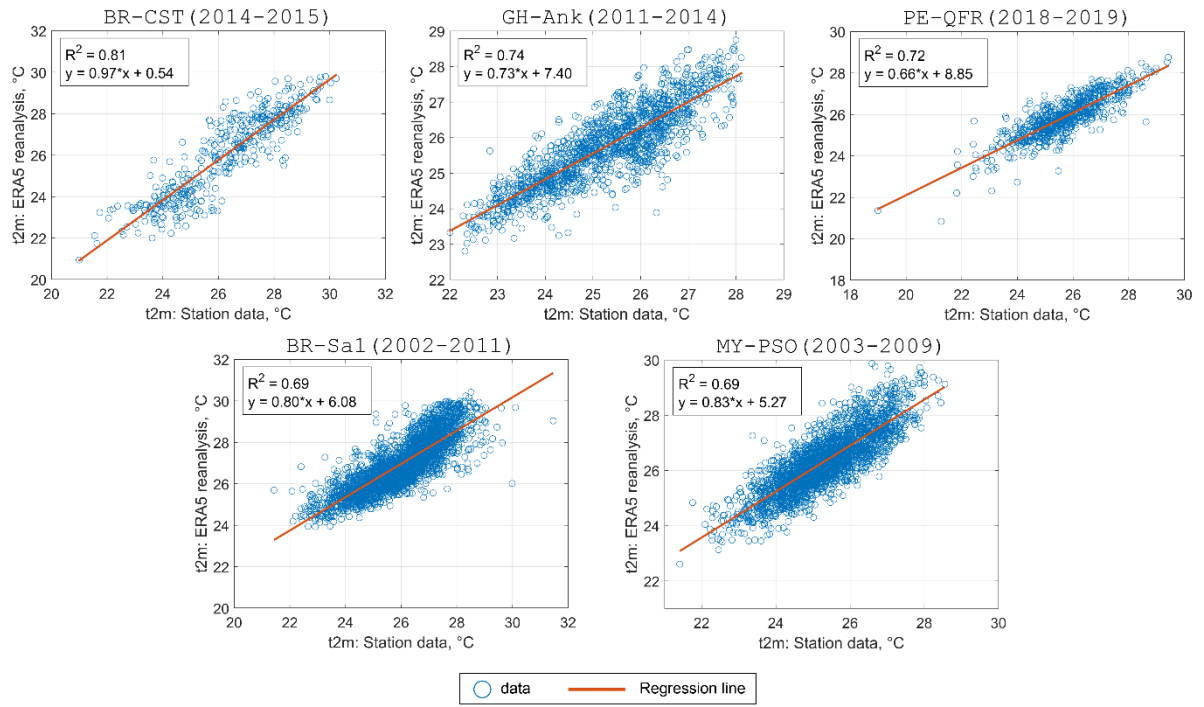

**Figure S2.** Scatter plots for stations with moderate agreement ( $R^2 < 0.85$ ,  $p < 0.05$ ) of daily temperature from ERA5 reanalysis versus stations data sets. The period is specified in the parentheses of plot title.

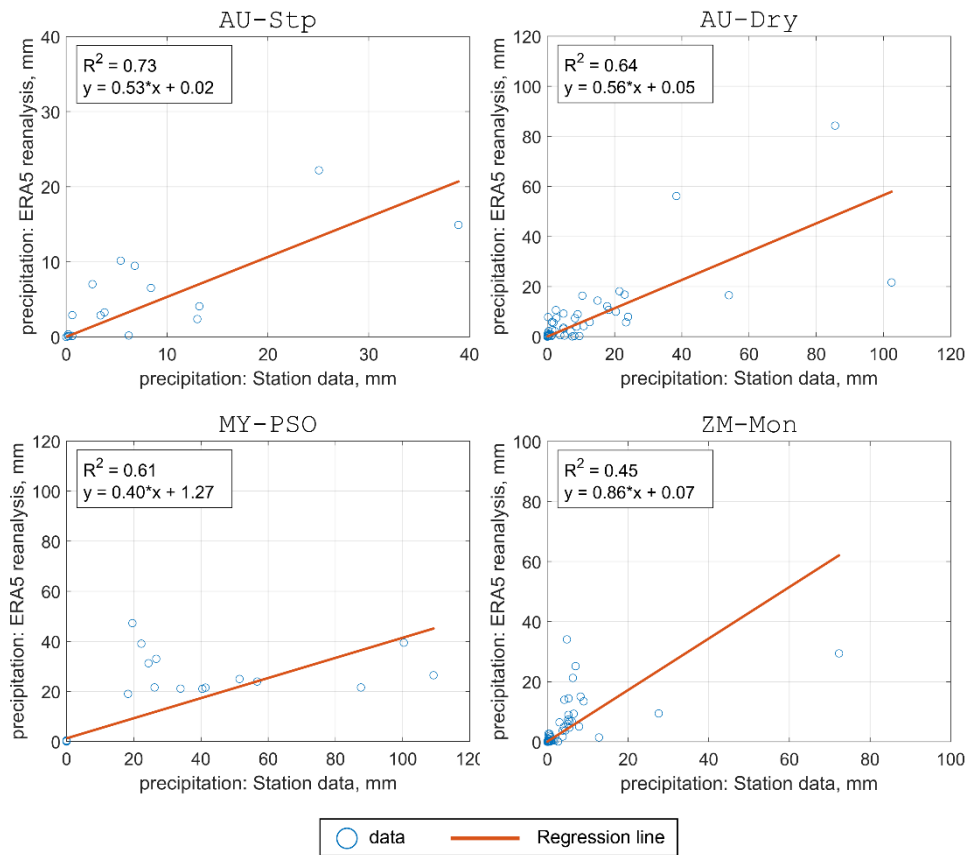

**Figure S3.** Scatter plots for stations of daily precipitation amount from the ERA5 reanalysis versus FLUXNET data sets with a period of observations longer than six years. The days when the daily precipitation from reanalysis and flux monitoring stations simultaneously exceeds the threshold 95% quantile (defined on the reanalysis data set) are considered. The period is specified in the parentheses of the plot title.

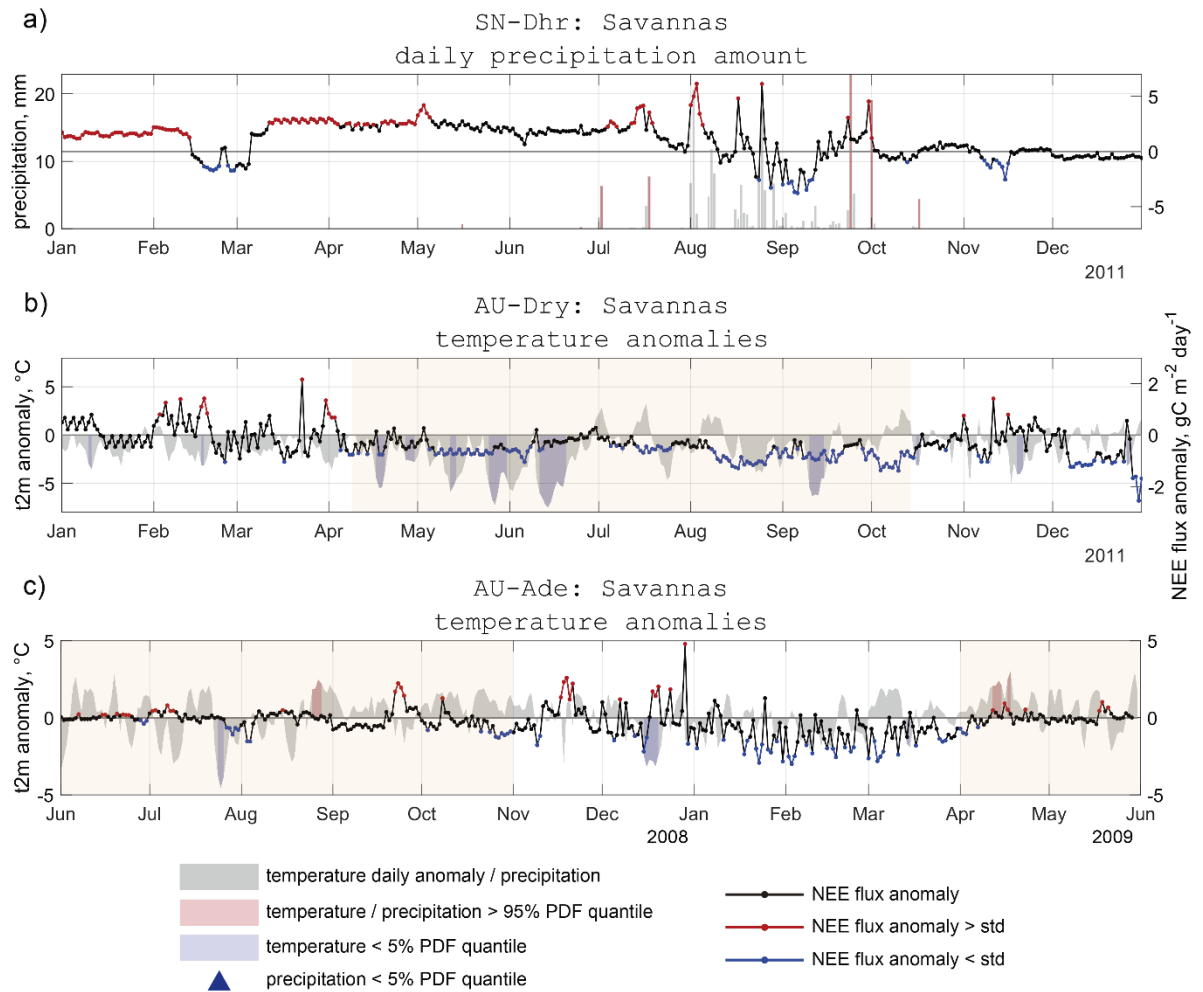

**Figure S4.** The time series of CO<sub>2</sub> flux anomaly and daily precipitation amount (a), daily temperature anomaly (b,c) in savannas at flux monitoring station SN-Dhr for 2011 (a), AU-Dry for 2011 (b) and AU-Ade for June 2008-June 2009. The days when the CO<sub>2</sub> flux anomalies were greater (lower) than 1STD are marked by red (blue) points. The red (blue) shading is applied for the periods when temperature anomalies exceed the upper (low) threshold: 95% (5%) PDF quantile. The red shaded column (blue triangle) is applied for the days when precipitation daily amount exceeds the upper (low) threshold: 95% (5%) PDF quantile. The yellow shading corresponds to the dry period.

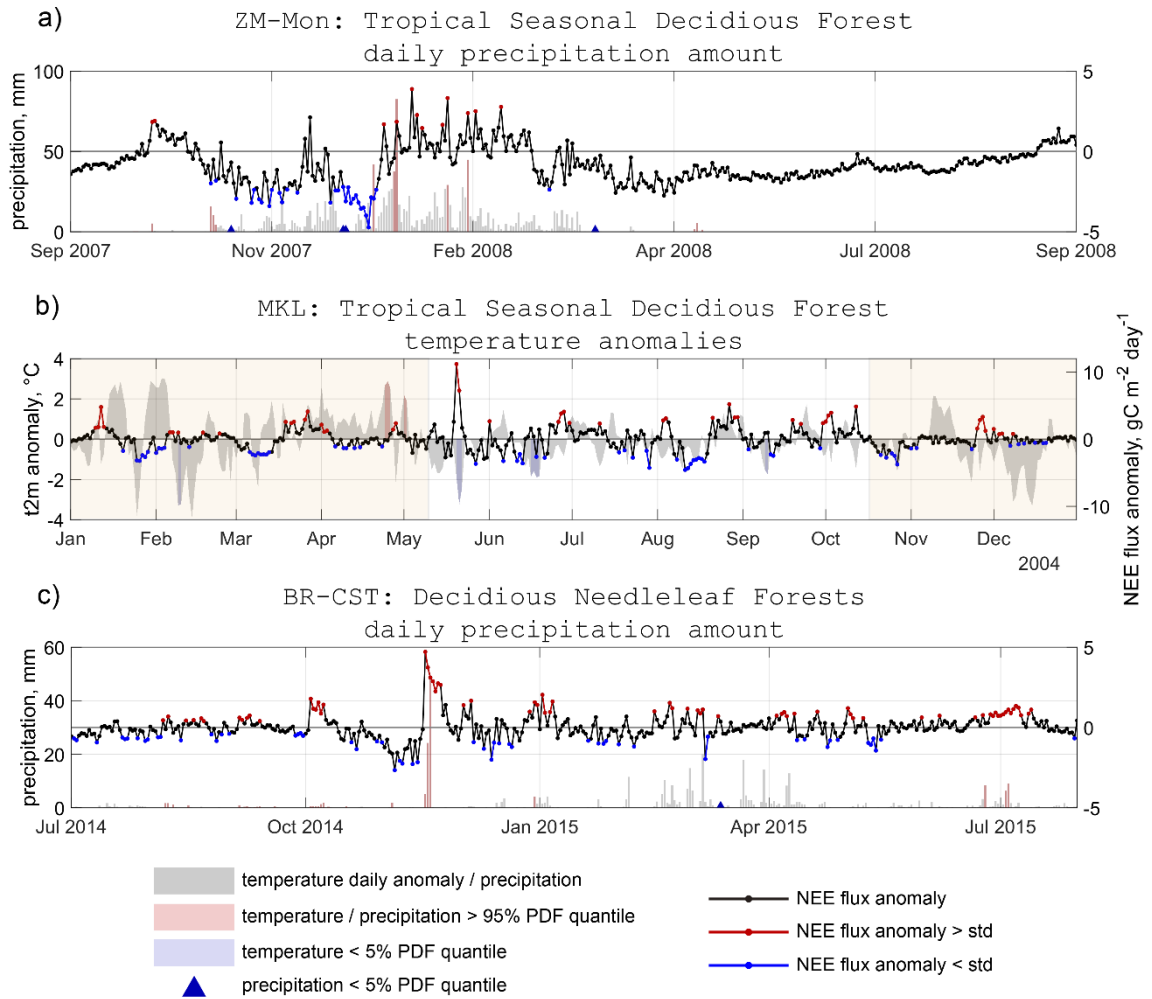

**Figure S5.** The time series of CO<sub>2</sub> flux anomaly and daily precipitation amount (a,c), daily temperature anomaly (b) in tropical seasonal or dry forests at flux monitoring station ZM-Mon for September 2007-September 2008 (a), MKL for 2004 (b) and BR-CST for June 2014-July 2015. The days when the CO<sub>2</sub> flux anomalies were greater (lower) than 1STD are marked by red (blue) points. The red (blue) shading is applied for the periods when temperature anomalies exceed the upper (lower) threshold: 95% (5%) PDF quantile. The red shaded column (blue triangle) is applied for the days when precipitation daily amount exceeds the upper (lower) threshold: 95% (5%)PDF quantile. The yellow shading corresponds to the dry period.

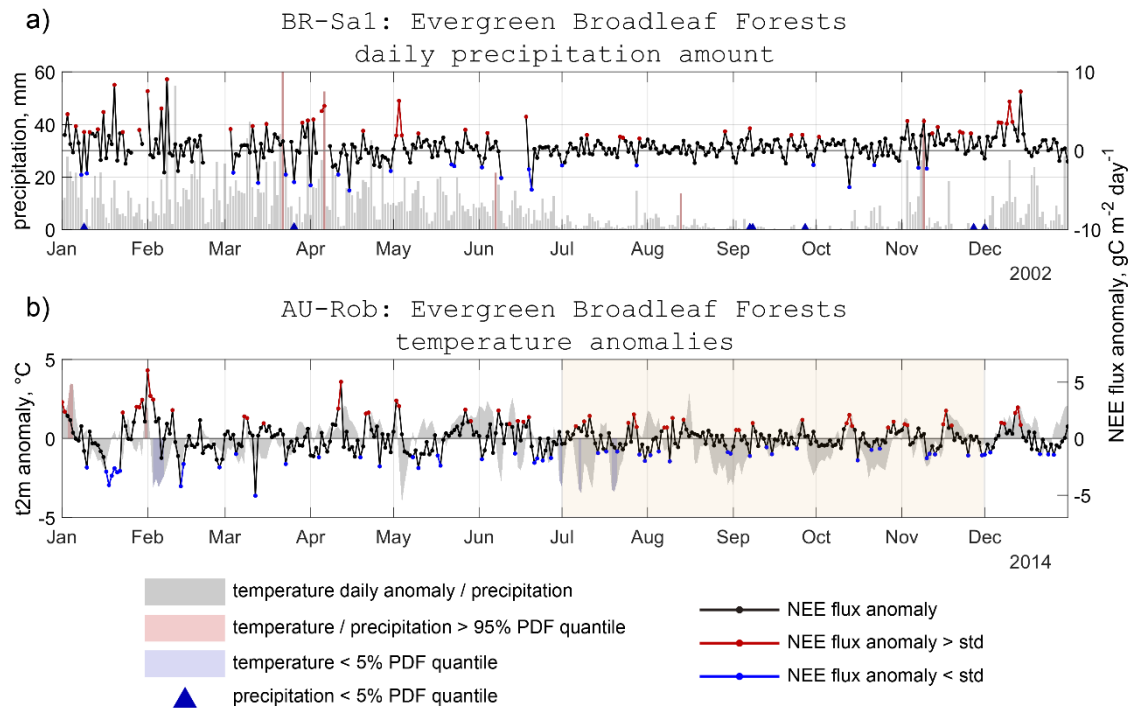

**Figure S6.** The time series of CO<sub>2</sub> flux anomaly and daily precipitation amount (a), daily temperature anomaly (b) in evergreen broadleaf forests at flux monitoring station BR-Sa1 for 2002 (a), AU-Rob for 2014 (b). The days when the CO<sub>2</sub> flux anomalies were greater (lower) than 1STD are marked by red (blue) points. The red (blue) shading is applied for the periods when temperature anomalies exceed the upper (low) threshold: 95% (5%) PDF quantile. The red shaded column (blue triangle) is applied for the days when precipitation daily amount exceeds the upper (low) threshold: 95% (5%)PDF quantile. The yellow shading corresponds to the dry period

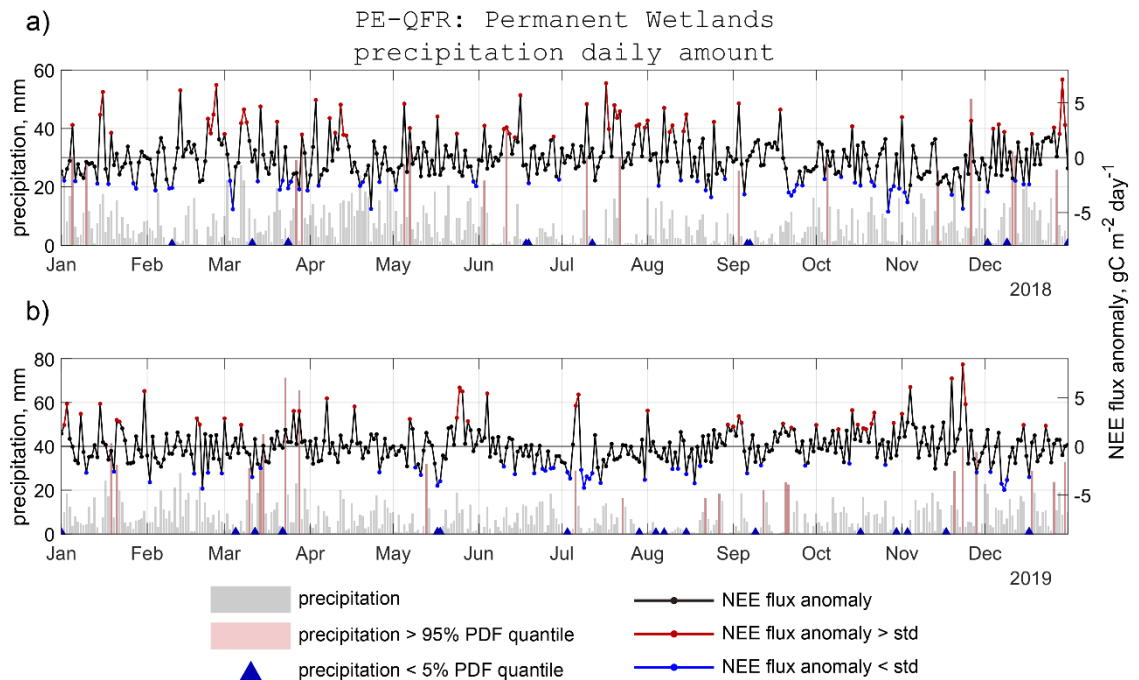

**Figure S7.** The time series of CO<sub>2</sub> flux anomaly and daily precipitation amount in wetlands at flux monitoring station PE-QFR for 2018 (a), 2019 (b). The days when the CO<sub>2</sub> flux anomalies were greater (lower) than 1STD are marked by red (blue) points. The red shading (blue triangle) is applied for the periods when precipitation exceed the upper (low) threshold: 95% (5%) PDF quantile.

**Table S1.** The number of samples (days) used for calculation of the correlation between the daily CO<sub>2</sub> flux and temperature/precipitation anomalies.

| Types of tropical ecosystems     | Stations | Number of samples (days), when the threshold is exceeded |       |       |       |       |
|----------------------------------|----------|----------------------------------------------------------|-------|-------|-------|-------|
|                                  |          | T Std                                                    | T Q90 | T Q95 | P Q90 | P Q95 |
| Savannas                         | AU-Ade   | 177                                                      | 49    | 15    | 38    | 10    |
|                                  | AU-Dry   | 648                                                      | 210   | 94    | 181   | 101   |
|                                  | AU-RDF   | 378                                                      | 87    | 32    | 101   | 48    |
|                                  | CG-Tch   | 240                                                      | 109   | 40    | 119   | 52    |
|                                  | SD-Dem   | 406                                                      | 150   | 60    | 61    | 22    |
|                                  | SN-Dhr   | 422                                                      | 166   | 72    | 123   | 71    |
| Evergreen broadleaf forests      | BR-Sa1   | 800                                                      | 231   | 89    | 244   | 102   |
|                                  | AU-Rob   | 88                                                       | 22    | 7     | 28    | 10    |
|                                  | GH-Ank   | 331                                                      | 142   | 54    | 129   | 53    |
|                                  | MY-PSO   | 715                                                      | 225   | 109   | 192   | 78    |
| Grasslands                       | AU-Stp   | 767                                                      | 199   | 78    | 150   | 54    |
| Permanent wetlands               | AU-Fog   | 324                                                      | 38    | 14    | 96    | 39    |
|                                  | PE-QFR   | 206                                                      | 74    | 37    | 80    | 38    |
| Deciduous needleleaf forest      | BR-CST   | 114                                                      | 46    | 18    | 52    | 30    |
| Tropical rain forest             | BNS      | 278                                                      | 84    | 36    | 111   | 53    |
| Tropical season deciduous forest | MKL      | 94                                                       | 28    | 9     | 19    | 8     |
|                                  | Zm-Mon   | 987                                                      | 304   | 127   | 255   | 136   |
